# Supplementary material for: 3-R-4-(5-Methyleneazide-1,2,4-oxadiazol-3-yl)furazan and its ionic salts as low-sensitivity and high-detonation energetic materials
Source: Royal Society of Chemistry journal article supplement (doi:10.1039/d1nj01099a), 2021-01-01
Supplement: d1nj01099a1.pdf [file d1nj01099a1.pdf]

## Supporting Information

### **3-R-4-(5-methyleneazide-1,2,4-oxadiazol-3-yl)furazan and its ionic salts as low-sensitivity and high-detonation energetic materials**

Rui Yang,<sup>a</sup> Yifei Liu<sup>a</sup>, Zhen Dong<sup>a</sup>, Haiyan Li<sup>a</sup> and Zhiwen Ye<sup>\*a</sup>

<sup>a</sup> School of Chemical Engineering, Nanjing University of Science and Technology, Xiaolingwei 200,  
Nanjing, Jiangsu, 210094, China. E-mail: yezw@njust.edu.cn.

## Computational details

All of the ab initio calculations involved in this work were carried out using the Gaussian 09 suite of programs[S1]. The geometric optimization and frequency analyses of the structures are based on available single-crystal structures and using the B3LYP functional with the 6-311+G\*\* basis set. The geometrical were optimized with no constraints imposed under default convergence criteria. Total energy ( $E_0$ ) and zero-point energy (ZPE) were calculated with vibrational frequency analysis. The heats of formation were obtained by using the isodesmic reaction approach. Atomization energies were obtained by employing the G2 ab initio method. All of the optimized structures were characterized to be true local energy minima on the potential energy surface without imaginary frequencies.

Based on a Born-Haber energy cycle (Scheme S1), the heat of formation of a salt can be simplified by the formula given in Equation (1):

$$H_f(\text{salt}, 298\text{K}) = H_f(\text{cation}, 298\text{K}) + H_f(\text{anion}, 298\text{K}) - H_L \quad (1)$$

where " $H_L$ " is the lattice energy of the salts, which could be predicted by using the formula suggested by Jenkins [S2]et al. [Eq. (2)]

$$H_L = U_{\text{POT}} + [p(n_M/2 - 2) + q(n_X/2 - 2)]RT \quad (2)$$

Where  $n_M$  and  $n_X$  depend on the nature of the ions,  $M_q^+$  and  $X_p^-$ , and are equal to 3 for monatomic ions, 5 for linear polyatomic ions, and 6 for nonlinear polyatomic ions.

The equation for lattice potential energy  $U_{\text{POT}}$  [Eq. (3)] has the form:

$$U_{\text{POT}} [\text{kJ mol}^{-1}] = \gamma(\rho_m/M_m)^{1/3} + \delta \quad (3)$$

where  $\rho_m$  ( $\text{g cm}^{-3}$ ) is the density of the salt,  $M_m$  is the chemical formula mass of the ionic material, and values for  $\gamma$  ( $\text{kJmol}^{-1}\text{cm}$ ) and  $\delta$  ( $\text{kJ mol}^{-1}$ ) are assigned literature values.

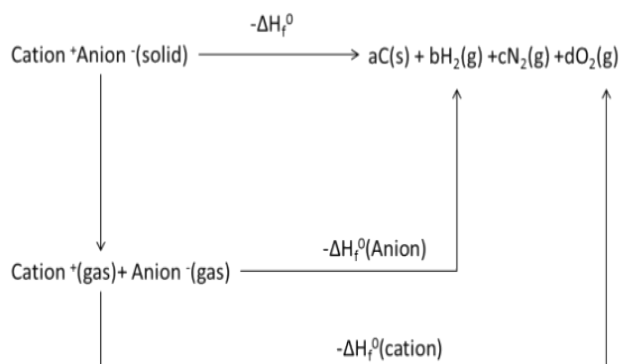

**Scheme S1.** Born-Haber Cycle for the Formation of energetic salts

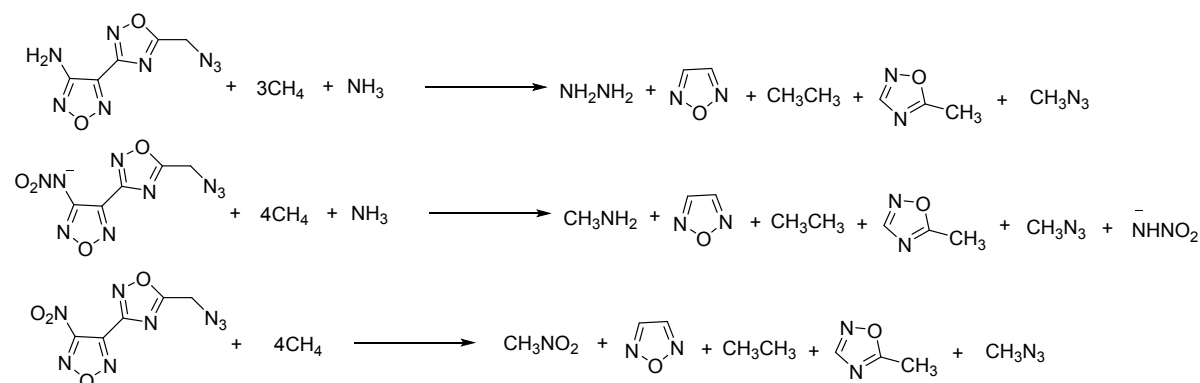

**Scheme S2** Equivalent bond equation of 4-(1,2,4-oxadiazol-3-yl)furazan compounds

**Crystallographic data**Table S1 Unit cell data of compounds **2** and **5**

|                                              | <b>2</b>                                                    | <b>5</b>                                                     |
|----------------------------------------------|-------------------------------------------------------------|--------------------------------------------------------------|
| Formula                                      | C <sub>5</sub> H <sub>4</sub> N <sub>8</sub> O <sub>2</sub> | C <sub>5</sub> H <sub>6</sub> N <sub>10</sub> O <sub>4</sub> |
| F <sub>w</sub> (g mol <sup>-1</sup> )        | 208.16                                                      | 270.20                                                       |
| Temperature (K)                              | 296                                                         | 296                                                          |
| Crystal system                               | orthorhombic                                                | triclinic                                                    |
| Space group                                  | P c a 21                                                    | P -1                                                         |
| Z                                            | 4                                                           | 4                                                            |
| a(Å)                                         | 19.831(2)                                                   | 8.2548(13)                                                   |
| b(Å)                                         | 5.3577(5)                                                   | 10.4530(17)                                                  |
| c(Å)                                         | 7.8562(9)                                                   | 13.508(2)                                                    |
| α(°)                                         | 90                                                          | 93.199(5)                                                    |
| β(°)                                         | 90                                                          | 99.554(4)                                                    |
| γ(°)                                         | 90                                                          | 106.901(4)                                                   |
| V(Å <sup>3</sup> )                           | 834.71(15)                                                  | 1093.1(3)                                                    |
| D <sub>c</sub> (g cm <sup>-3</sup> )         | 1.656                                                       | 1.642                                                        |
| μ(mm <sup>-1</sup> )                         | 0.135                                                       | 0.142                                                        |
| F(000)                                       | 424.0                                                       | 552.0                                                        |
| Crystal size (mm <sup>3</sup> )              | 0.22×0.21×0.01                                              | 0.2×0.18×0.01                                                |
|                                              | -24<h<26                                                    | -10<h<10                                                     |
| Index ranges                                 | -7<k<6                                                      | -13<k<13                                                     |
|                                              | -10<l<10                                                    | -17<l<17                                                     |
| θ(°)                                         | 3.308-28.253                                                | 2.423-27.552                                                 |
| Refl. Coll.                                  | 1984                                                        | 4980                                                         |
| Independ. refl. [Rint]                       | 1477                                                        | 2573                                                         |
| R <sub>1</sub> , wR <sub>2</sub> [I > 2σ(I)] | 0.0503, 0.1122                                              | 0.0688, 0.1551                                               |
| R <sub>1</sub> , wR <sub>2</sub> (all)       | 0.0796, 0.1215                                              | 0.1521, 0.1897                                               |
| CCDC                                         | 2048721                                                     | 2045479                                                      |

Table S2 - Bond Distances of Compound **2**

| bond  | distances(Å) | bond  | distances(Å) |
|-------|--------------|-------|--------------|
| O1-N1 | 1.402(4)     | N6-N7 | 1.154(5)     |
| O1-N2 | 1.362(4)     | N6-C5 | 1.497(5)     |
| O2-N3 | 1.413(4)     | N7-N8 | 1.139(6)     |

|       |          |        |          |
|-------|----------|--------|----------|
| O2-C4 | 1.334(4) | N5-H5A | 0.8600   |
| N1-C1 | 1.307(5) | N5-H5B | 0.8600   |
| N2-C2 | 1.300(5) | C1-C2  | 1.433(5) |
| N3-C3 | 1.288(5) | C2-C3  | 1.457(5) |
| N4-C3 | 1.377(4) | C4-C5  | 1.495(5) |
| N4-C4 | 1.281(4) | C5-H5C | 0.9700   |
| N5-C1 | 1.341(5) | C5-H5D | 0.9700   |

Table S3 - Bond Angles of Compound 2

|            |          |            |          |
|------------|----------|------------|----------|
| N1-O1-N2   | 111.0(2) | N2-C2-C3   | 121.2(3) |
| N3-O2-C4   | 106.1(2) | C1-C2-C3   | 129.0(3) |
| O1-N1-C1   | 105.3(3) | N4-C3-C2   | 122.8(3) |
| O1-N2-C2   | 105.8(3) | N3-C3-N4   | 115.5(3) |
| O2-N3-C3   | 102.6(3) | N3-C3-C2   | 121.6(3) |
| C3-N4-C4   | 101.8(3) | O2-C4-N4   | 114.1(3) |
| N7-N6-C5   | 113.3(4) | O2-C4-C5   | 117.8(3) |
| N6-N7-N8   | 171.2(5) | N4-C4-C5   | 128.0(3) |
| H5A-N5-H5B | 120.00   | N6-C5-C4   | 109.8(4) |
| C1-N5-H5B  | 120.00   | N6-C5-H5C  | 110.00   |
| C1-N5-H5A  | 120.00   | N6-C5-H5D  | 110.00   |
| N5-C1 -C2  | 127.2(3) | C4-C5-H5C  | 110.00   |
| N1-C1-C2   | 108.1(3) | C4-C5-H5D  | 110.00   |
| N1-C1-N5   | 124.7(3) | H5C-C5-H5D | 108.00   |
| N2-C2-C1   | 109.7(3) |            |          |

Table S4 - Torsion Angles of Compound 2

|             |           |
|-------------|-----------|
| N2-O1-N1-C1 | 0.5(4)    |
| N1-O1-N2-C2 | -0.3(4)   |
| C4-O2-N3-C3 | 0.2(4)    |
| N3-O2-C4-N4 | 0.5(4)    |
| N3-O2-C4-C5 | -176.7(3) |
| O1-N1-C1-N5 | 179.7(4)  |
| O1-N1-C1-C2 | -0.5(4)   |
| O1-N2-C2-C3 | 176.9(3)  |
| O1-N2-C2-C1 | 0.0(4)    |
| O2-N3-C3-N4 | -0.8(4)   |
| O2-N3-C3-C2 | 176.5(3)  |
| C4-N4-C3-C2 | -176.2(4) |
| C3-N4-C4-O2 | -0.9(4)   |

|               |           |
|---------------|-----------|
| C3N4-C4-C5    | 176.0(4)  |
| C4-N4-C3-N3   | 1.1(4)    |
| N7-N6-C5-C4   | -169.3(4) |
| N1-C1-C2-N2   | 0.3(5)    |
| N1-C1-C2-C3   | -176.3(4) |
| N5-C1-C2-C3   | 3.6(7)    |
| N5-C1-C2-N2   | -179.9(4) |
| C1-C2-C3-N3   | -0.9(6)   |
| C1-C2-C3-N4   | 176.2(4)  |
| N2-C2-C3-N4   | 0.0(6)    |
| N2-C2 -C3-N3  | -177.1(4) |
| O2-C4 -C5 -N6 | -60.0(4)  |
| N4-C4-C5-N6   | 123.2(4)  |

Table S4 - Hydrogen Bonds of compound 2

|                  | D--H(Å) | H···A(Å) | D--<br>H···A(Å) | D-H···A (°) |
|------------------|---------|----------|-----------------|-------------|
| N5 -- H5A ... N4 | 0.8600  | 2.2800   | 3.121(4)        | 165.00      |
| N5 -- H5B ... N3 | 0.8600  | 2.4500   | 3.016(5)        | 124.00      |
| C5 -- H5C ... N1 | 0.9700  | 2.5300   | 3.472(5)        | 163.00      |

Table S5 - Bond Distances of Compound 5

|        |          |          |           |
|--------|----------|----------|-----------|
| O1-N1  | 1.395(5) | N12-C8   | 1.376(4)  |
| O1-N2  | 1.374(6) | N13-C8   | 1.290(4)  |
| O2-N4  | 1.407(5) | N14-N15  | 1.150(5)  |
| O2-C4  | 1.335(6) | N14-C10  | 1.518(5)  |
| O3-N9  | 1.261(4) | N15-N16  | 1.146(7)  |
| O4-N9  | 1.237(4) | N17-N18  | 1.314(3)  |
| O5-N10 | 1.403(4) | N17-C6   | 1.373(4)  |
| O5-N11 | 1.364(4) | N19-H19D | 0.79(2)   |
| O6-N13 | 1.401(4) | N19-H19A | 0.795(19) |
| O6-C9  | 1.336(4) | N19-H19C | 0.80(3)   |
| O7-N18 | 1.244(4) | N19-H19B | 0.79(3)   |
| O8-N18 | 1.250(3) | N20-H20C | 0.88(2)   |
| N1-C1  | 1.315(5) | N20-H20D | 0.91(3)   |
| N2-C2  | 1.305(6) | N20-H20B | 0.88(2)   |
| N3-C3  | 1.380(5) | N20-H20A | 0.88(2)   |
| N3-C4  | 1.287(6) | C1-C2    | 1.427(6)  |
| N4-C3  | 1.294(6) | C2-C3    | 1.447(6)  |
| N5-N6  | 1.194(9) | C4-C5    | 1.470(7)  |
| N5-C5  | 1.432(9) | C5-H5B   | 0.9700    |
| N6-N7  | 1.124(9) | C-H5A    | 0.9700    |

|        |          |          |          |
|--------|----------|----------|----------|
| N8-N9  | 1.306(4) | C6-C7    | 1.440(4) |
| N8-C1  | 1.370(5) | C7-C8    | 1.448(4) |
| N10-C6 | 1.310(4) | C9-C10   | 1.485(5) |
| N11-C7 | 1.302(4) | C10-H10A | 0.9700   |
| N12-C9 | 1.278(4) | C10-H10B | 0.9700   |

Table S6 - Bond Angles of compound **5**

|               |          |               |          |
|---------------|----------|---------------|----------|
| N1-O1-N2      | 111.3(3) | H19A-N19-H19D | 110(3)   |
| N4-O2-C4      | 106.9(3) | H19A-N19-H19C | 108(3)   |
| N10-O5-N11    | 111.3(2) | H20C-N20-H20D | 108(2)   |
| N13-O6-C9     | 106.5(2) | H20A-N20-H20C | 111(2)   |
| O1-N1-C1      | 104.8(4) | H20A-N20-H20B | 111(3)   |
| O1-N2-C2      | 105.6(3) | H20B-N20-H20D | 107(2)   |
| C3-N3-C4      | 103.0(3) | H20A-N20-H20D | 108(3)   |
| O2-N4-C3      | 103.1(3) | H20B-N20-H20C | 111(2)   |
| N6-N5-C5      | 115.0(6) | N1-C1-C2      | 108.9(4) |
| N5-N6-N7      | 166.0(9) | N1-C1 -N8     | 131.3(4) |
| N9-N8-C1      | 116.5(3) | N8-C1-C2      | 119.8(3) |
| O3-N9-N8      | 115.2(3) | C1-C2 -C3     | 130.5(4) |
| O4-N9-N8      | 125.1(3) | N2-C2-C1      | 109.4(4) |
| O3-N9-O4      | 119.7(3) | N2-C2-C3      | 120.1(4) |
| O5-N10-C6     | 105.2(3) | N3-C3-C2      | 125.2(4) |
| O5-N11-C7     | 105.8(3) | N3-C3-N4      | 114.3(4) |
| C8-N12-C9     | 102.4(3) | N4-C3-C2      | 120.5(4) |
| O6-N13-C8     | 103.0(2) | O2-C4-C5      | 119.2(4) |
| N15-N14 -C10  | 114.1(3) | O2-C4-N3      | 112.7(4) |
| N14-N15-N16   | 170.7(5) | N3-C4-C5      | 128.0(5) |
| N18-N17 -C6   | 116.2(2) | N5-C5-C4      | 108.8(5) |
| O7-N18-O8     | 120.4(2) | C4-C5-H5B     | 110.00   |
| O8-N18-N17    | 123.3(3) | N5-C5-H5B     | 110.00   |
| O7-N18-N17    | 116.3(2) | C4-C5-H5A     | 110.00   |
| H19B-N19-H19D | 112(3)   | H5A-C5-H5B    | 108.00   |
| H19A-N19-H19B | 110(3)   | N5-C5-H5A     | 110.00   |
| H19B-N19-H19C | 107(3)   | N10-C6-C7     | 108.2(3) |
| H19C-N19-H19D | 109(3)   | N17-C6-C7     | 120.4(3) |
| N10-C6-N17    | 131.4(3) | O6-C9-C10     | 117.4(3) |
| N11-C7-C6     | 109.6(3) | N12-C9-C10    | 129.3(3) |
| N11-C7-C8     | 120.1(3) | N14-C10-C9    | 108.7(3) |
| C6-C7-C8      | 130.3(3) | C9-C10-H10A   | 110.00   |
| N12-C8-C7     | 122.0(2) | C9-C10-H10B   | 110.00   |
| N13-C8-C7     | 123.2(3) | H10A-C10-H10B | 108.00   |
| N12-C8-N13    | 114.8(3) | N14-C10-H10A  | 110.00   |

|           |          |              |        |
|-----------|----------|--------------|--------|
| O6-C9-N12 | 113.3(3) | N14-C10-H10B | 110.00 |
|-----------|----------|--------------|--------|

Table S7 - Torsion Angles of compound 5

|               |           |                |           |
|---------------|-----------|----------------|-----------|
| N2-O1-N1-C1   | 0.1(4)    | N1-O1-N2-C2    | 0.2(5)    |
| C4-O2-N4-C3   | 0.4(5)    | N4-O2-C4-C5    | 176.8(4)  |
| N4-O2-C4-N3   | -0.7(5)   | N10-O5-N11-C7  | -0.2(3)   |
| N11-O5-N10-C6 | -0.4(3)   | N13-O6-C9-N12  | 0.1(3)    |
| C9-O6-N13-C8  | 0.0(3)    | N13-O6-C9-C10  | -178.8(3) |
| O1-N1-C1-N8   | -179.2(4) | O1-N1-C1-C2    | -0.3(4)   |
| O1-N2-C2-C3   | 179.6(4)  | O1-N2-C2-C1    | -0.4(5)   |
| C3-N3-C4-C5   | -176.5(5) | C4-N3-C3-N4    | -0.4(5)   |
| C3-N3-C4-O2   | 0.7(5)    | C4-N3-C3-C2    | 177.7(4)  |
| O2-N4-C3-N3   | 0.0(5)    | O2-N4-C3-C2    | -178.3(4) |
| N6-N5-C5-C4   | 166.2(6)  | C1-N8-N9-O4    | -4.8(5)   |
| C1-N8-N9-O3   | 173.5(3)  | N9-N8-C1-C2    | -173.3(3) |
| N9-N8-C1-N1   | 5.5(6)    | O5-N10-C6-C7   | 0.7(3)    |
| O5-N10-C6-N17 | -178.0(3) | O5-N11-C7-C8   | 179.1(2)  |
| O5-N11-C7-C6  | 0.6(3)    | C8-N12-C9-C10  | 178.5(3)  |
| C9-N12-C8-N13 | 0.2(3)    | C8-N12-C9-O6   | -0.1(3)   |
| C9-N12-C8-C7  | -178.2(3) | O6-N13-C8-N12  | -0.1(3)   |
| O6-N13-C8-C7  | 178.2(2)  | N15-N14-C10-C9 | -128.6(4) |
| C6-N17-N18-O8 | 0.5(4)    | C6-N17-N18-O7  | -179.5(2) |
| N18-N17-C6-C7 | 176.6(2)  | N18-N17-C6-N10 | -4.8(5)   |
| N1-C1-C2-N2   | 0.5(5)    | N8-C1-C2-N2    | 179.5(3)  |
| N1-C1-C2-C3   | -179.5(4) | N8-C1-C2-C3    | -0.5(6)   |
| C1-C2-C3-N4   | -159.6(4) | N2-C2-C3-N4    | 20.4(6)   |
| C1-C2-C3-N3   | 22.4(7)   | N2-C2-C3-N3    | -157.6(4) |
| O2-C4-C5-N5   | 33.8(6)   | N3-C4-C5-N5    | -149.1(5) |
| N10-C6-C7-N11 | -0.9(3)   | N10-C6-C7-C8   | -179.1(3) |
| N17-C6-C7-C8  | -0.3(5)   | N17-C6-C7-N11  | 178.0(3)  |
| C6-C7-C8-N12  | 173.1(3)  | C6-C7-C8-N13   | -5.1(5)   |
| N11-C7-C8-N13 | 176.8(3)  | N11-C7-C8-N12  | -5.1(4)   |
| O6-C9-C10-N14 | 72.1(4)   | N12-C9-C10-N14 | -106.5(4) |

Table S9 - Hydrogen Bonds of Compound 5

|                     | D--H(Å)   | H...A(Å)  | D--H...A(Å) | D-H...A (°) |
|---------------------|-----------|-----------|-------------|-------------|
| N19 -- H19A ... N3  | 0.795(19) | 2.298(19) | 3.086(4)    | 172(3)      |
| N19 -- H19B ... O7  | 0.79(3)   | 2.54(3)   | 3.017(4)    | 120(2)      |
| N19 -- H19B ... N17 | 0.79(3)   | 2.30(3)   | 3.080(4)    | 173(3)      |
| N19 -- H19C ... N11 | 0.80(3)   | 2.56(3)   | 3.305(4)    | 156(3)      |

|                     |         |         |          |           |
|---------------------|---------|---------|----------|-----------|
| N19 -- H19D ... O3  | 0.79(2) | 2.17(2) | 2.924(4) | 160(3)    |
| N20 -- H20B ... O3  | 0.88(2) | 2.48(3) | 3.043(3) | 122(2)    |
| N20 -- H20B ... O4  | 0.88(2) | 2.09(2) | 2.961(4) | 168(2)    |
| N20 -- H20B ... N9  | 0.88(2) | 2.61(2) | 3.376(4) | 146(3)    |
| N20 -- H20C ... O8  | 0.88(2) | 1.97(2) | 2.852(3) | 177.2(19) |
| N20 -- H20C ... N18 | 0.88(2) | 2.61(2) | 3.405(3) | 150(2)    |
| N20 -- H20D ... O3  | 0.91(3) | 1.92(3) | 2.821(4) | 174(2)    |
| C5 -- H5A ... N11   | 0.9700  | 2.5500  | 3.514(6) | 171.00    |
| C5 -- H5B ... N16   | 0.9700  | 2.5700  | 3.360(8) | 139.00    |
| C10 -- H10B ... N8  | 0.9700  | 2.6100  | 3.541(5) | 161.00    |

NMR spectra data of all compounds

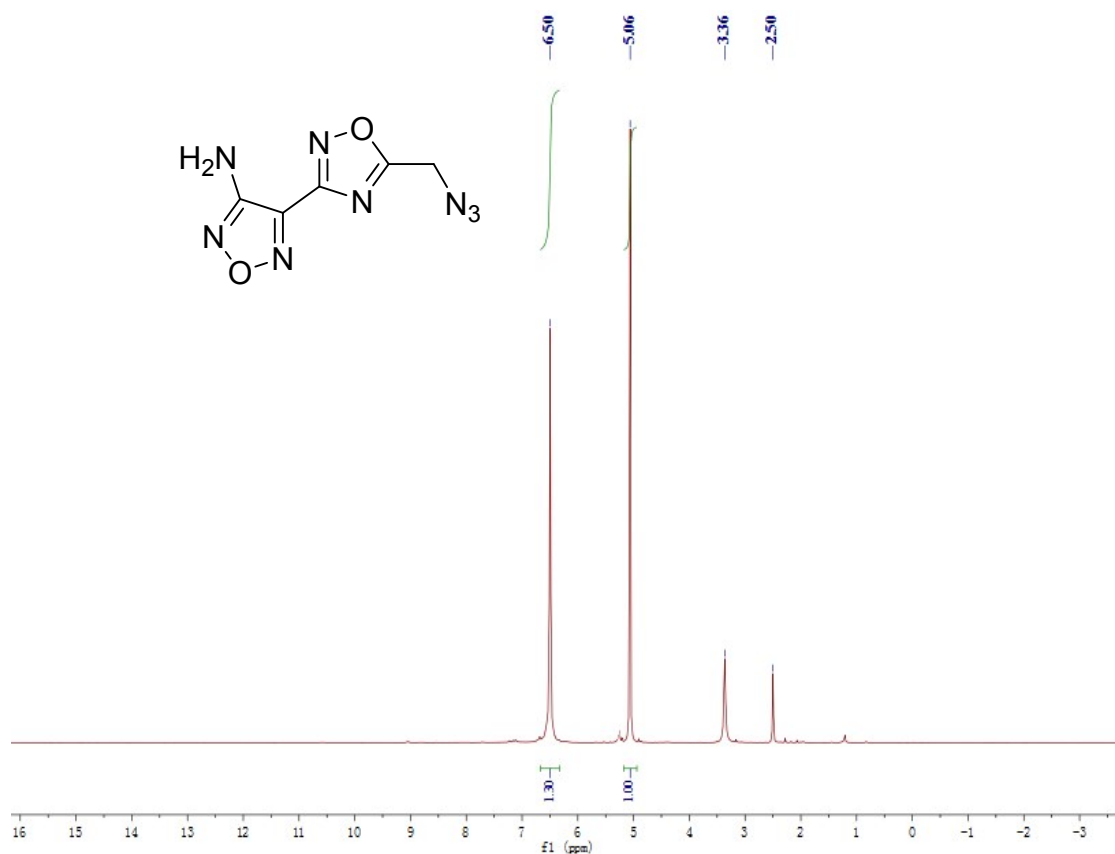

Figure S1 <sup>1</sup>H NMR for compound 2



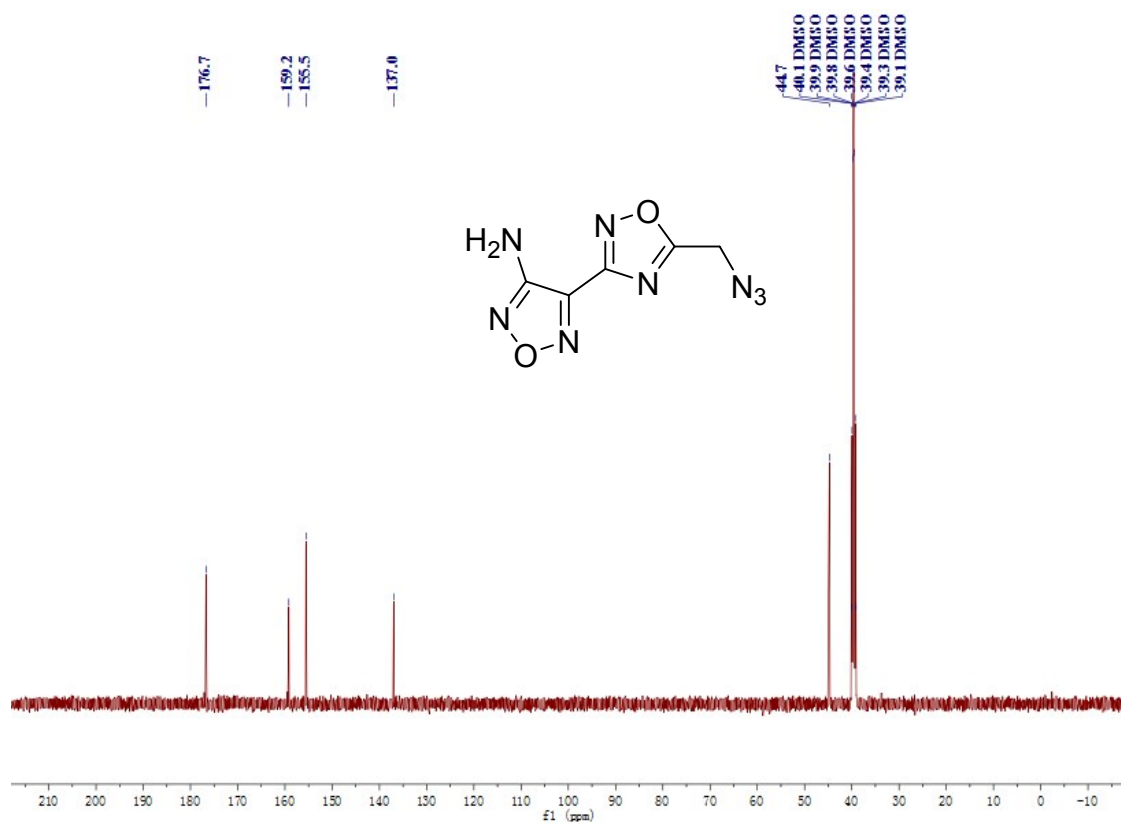

Figure S2 <sup>13</sup>C NMR for compound 2

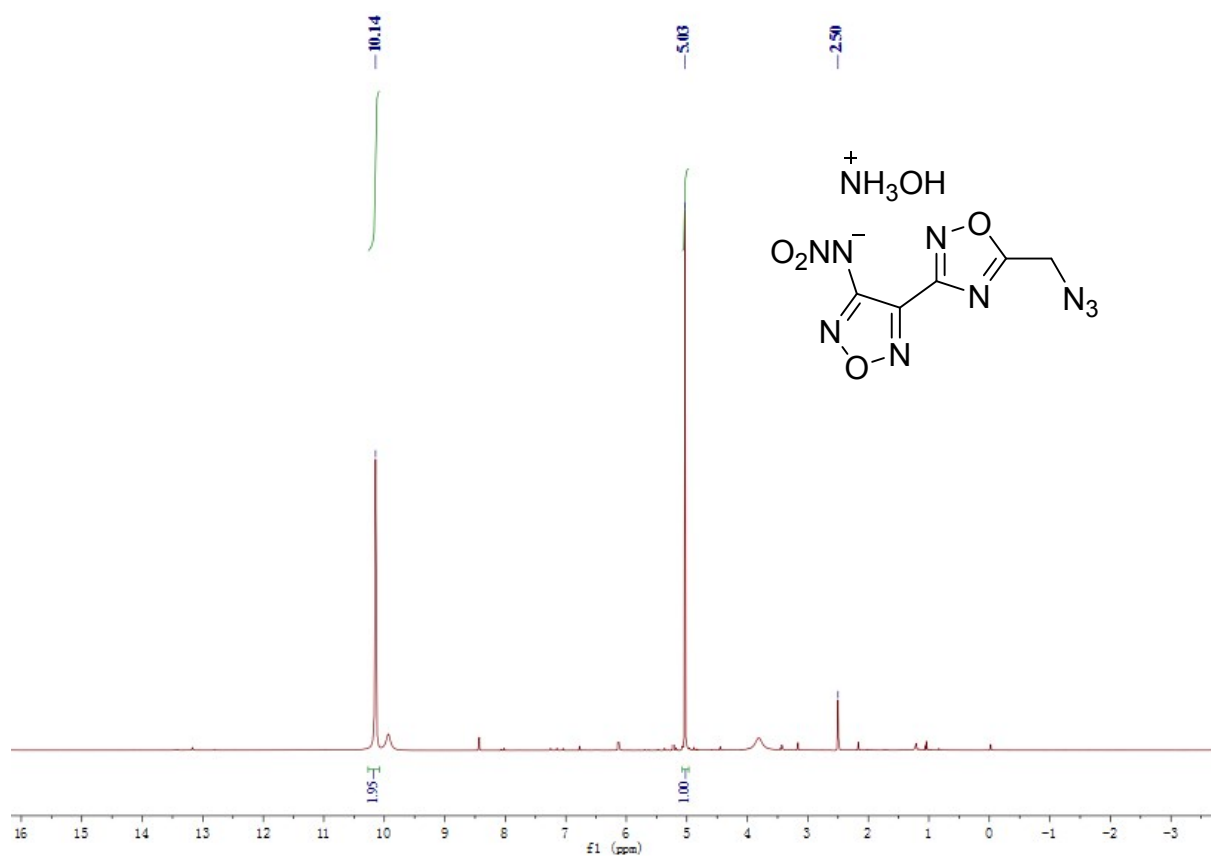

Figure S3 <sup>1</sup>H NMR for compound 4

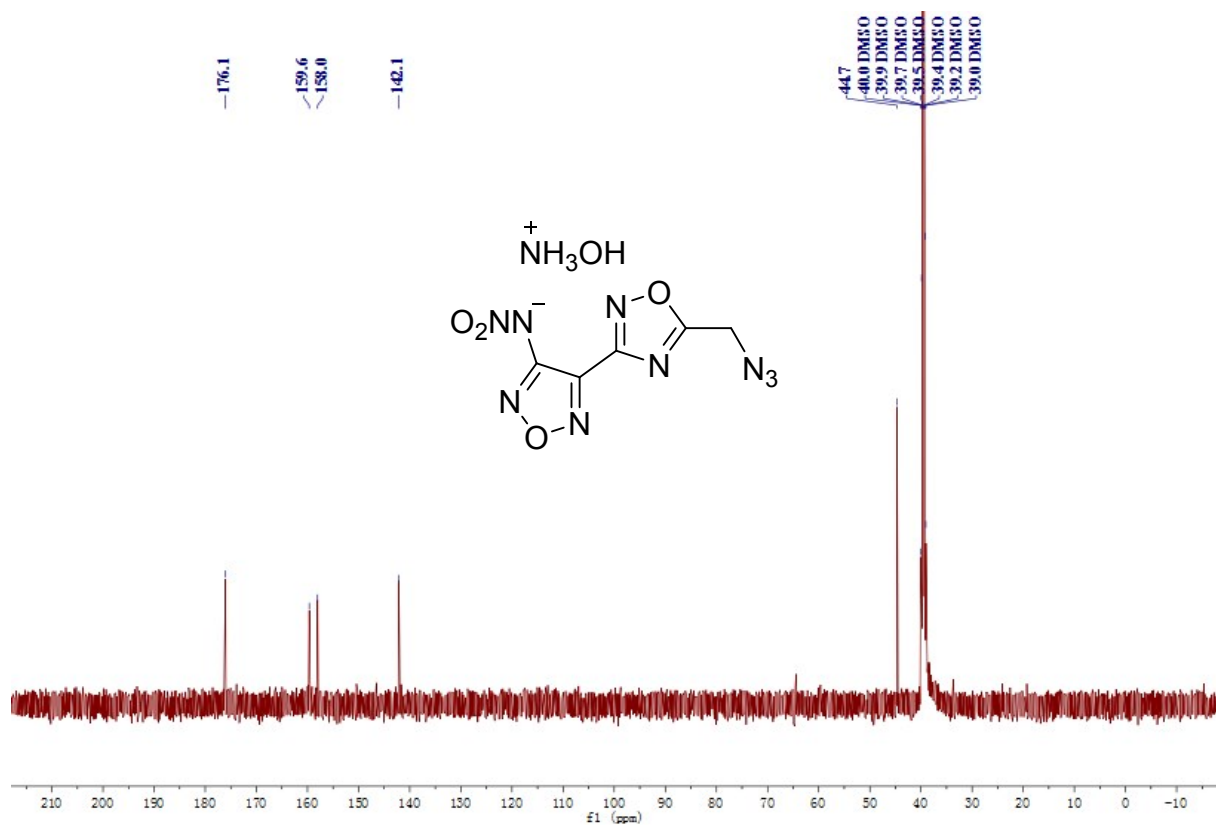

Figure S4 <sup>13</sup>C NMR for compound 4

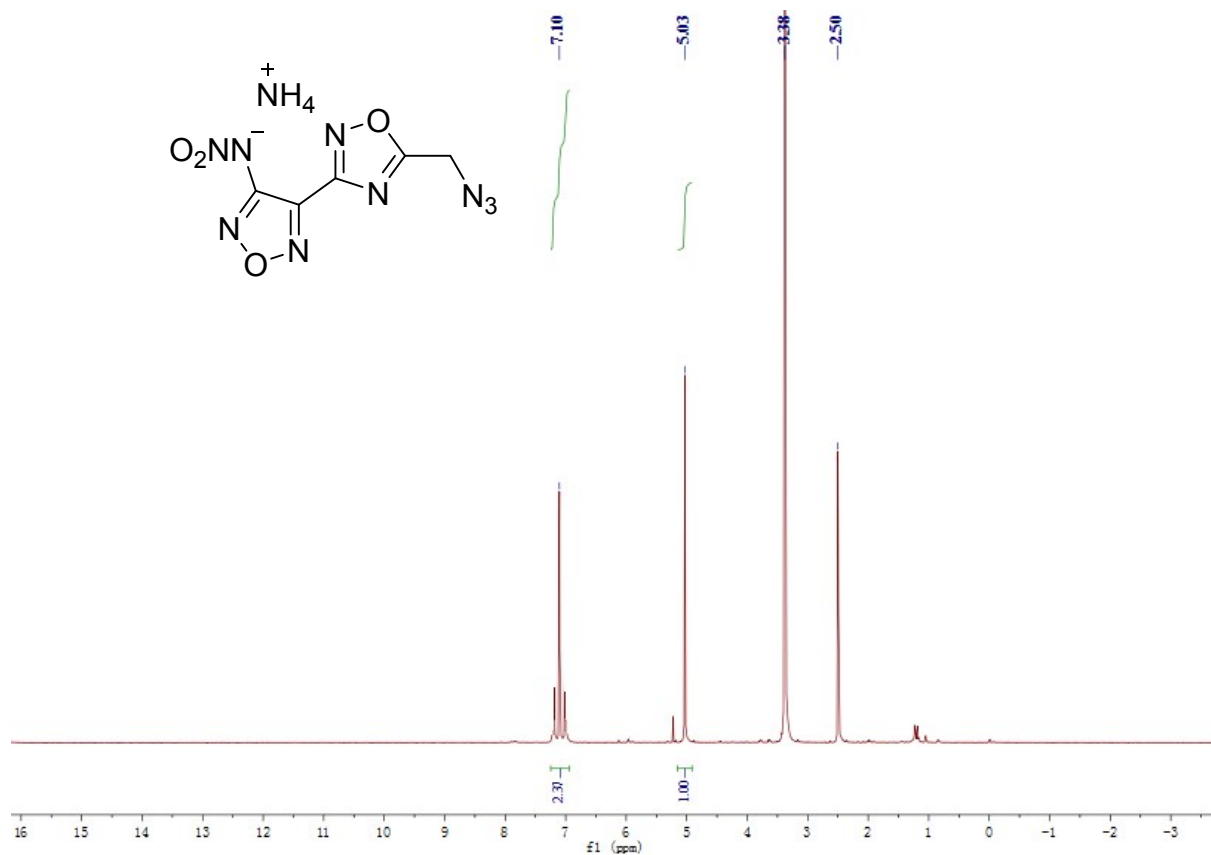

Figure S5 <sup>1</sup>H NMR for compound 5

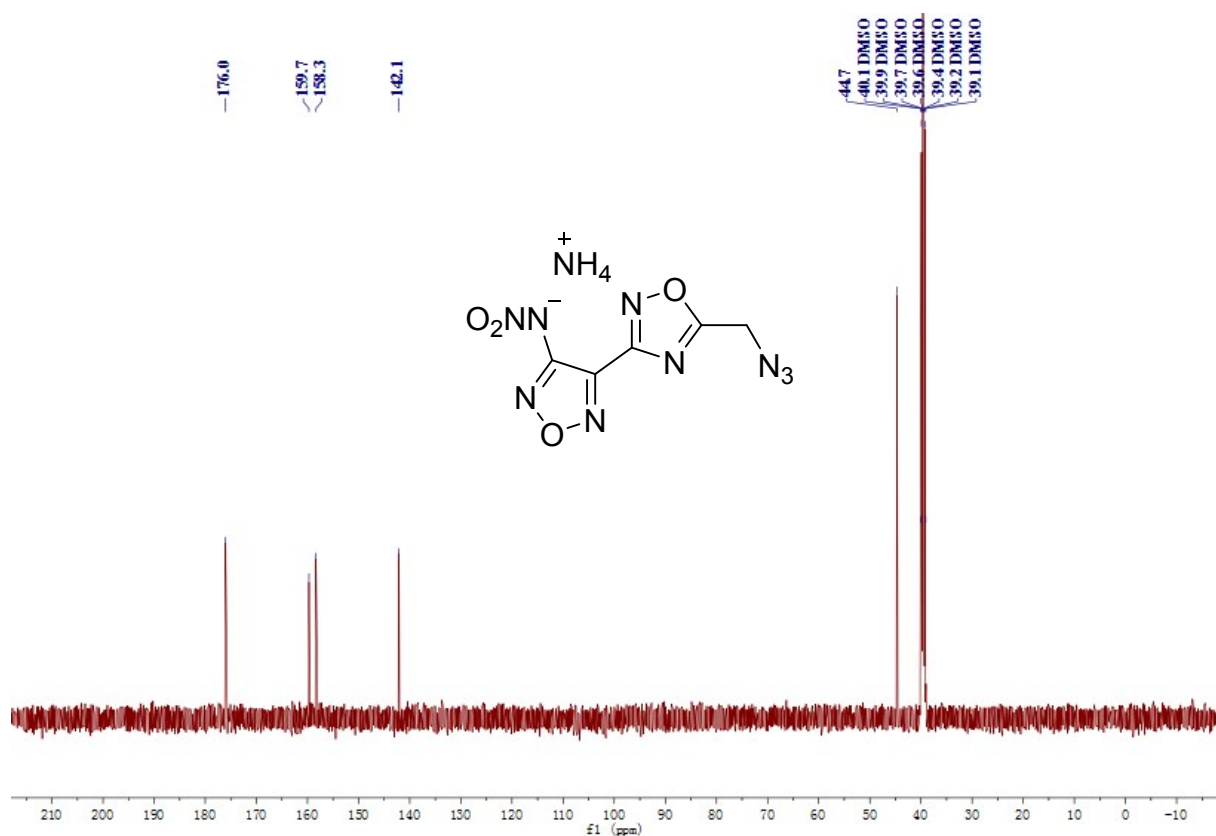

Figure S6  $^{13}\text{C}$  NMR for compound 5

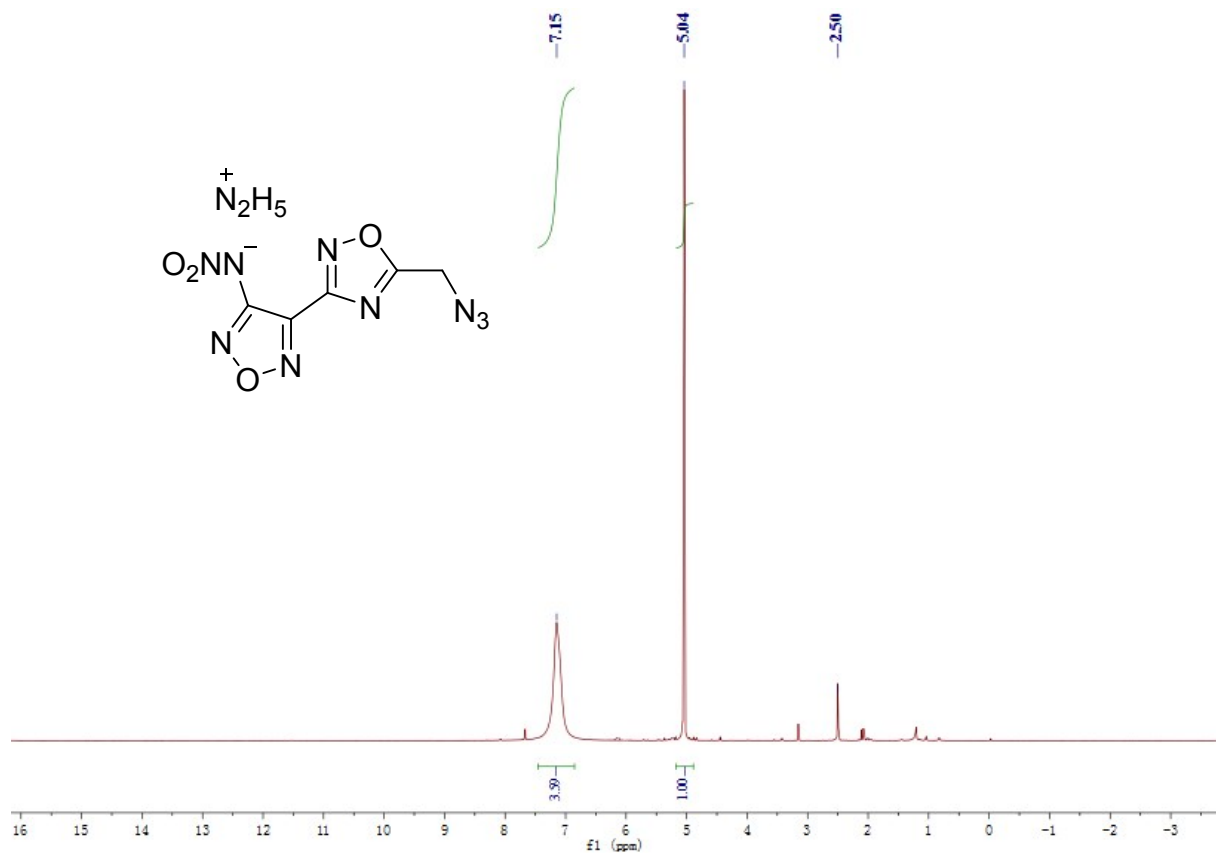

Figure S7  $^1\text{H}$  NMR for compound 6

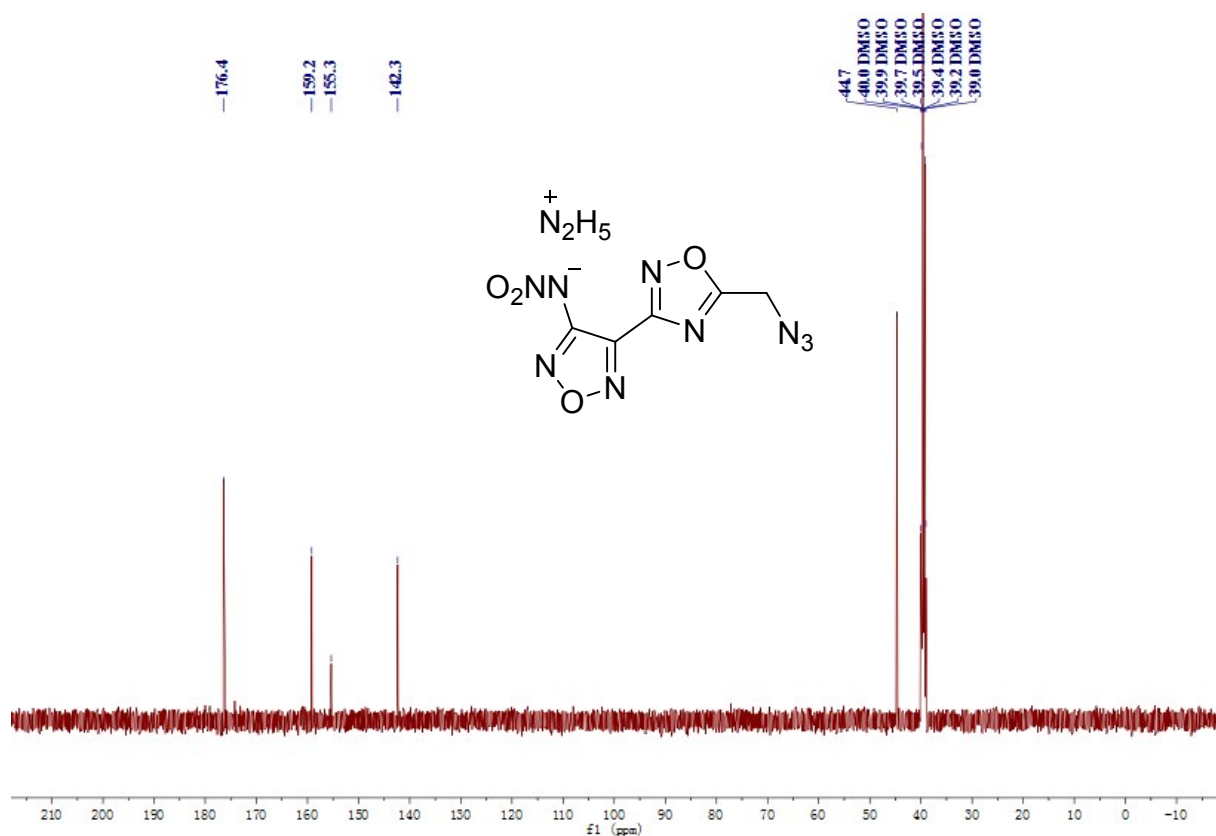

Figure S8  $^{13}\text{C}$  NMR for compound 6

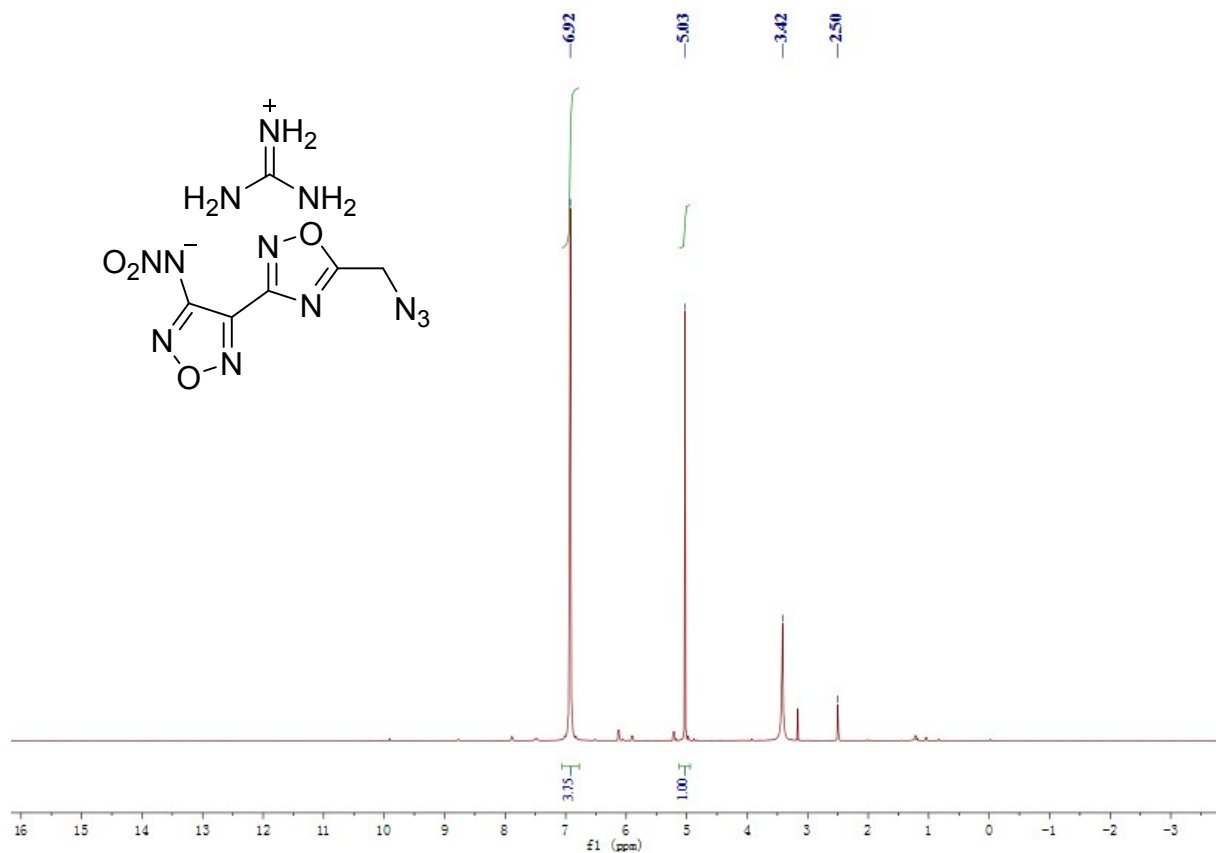

Figure S9  $^1\text{H}$  NMR for compound 7

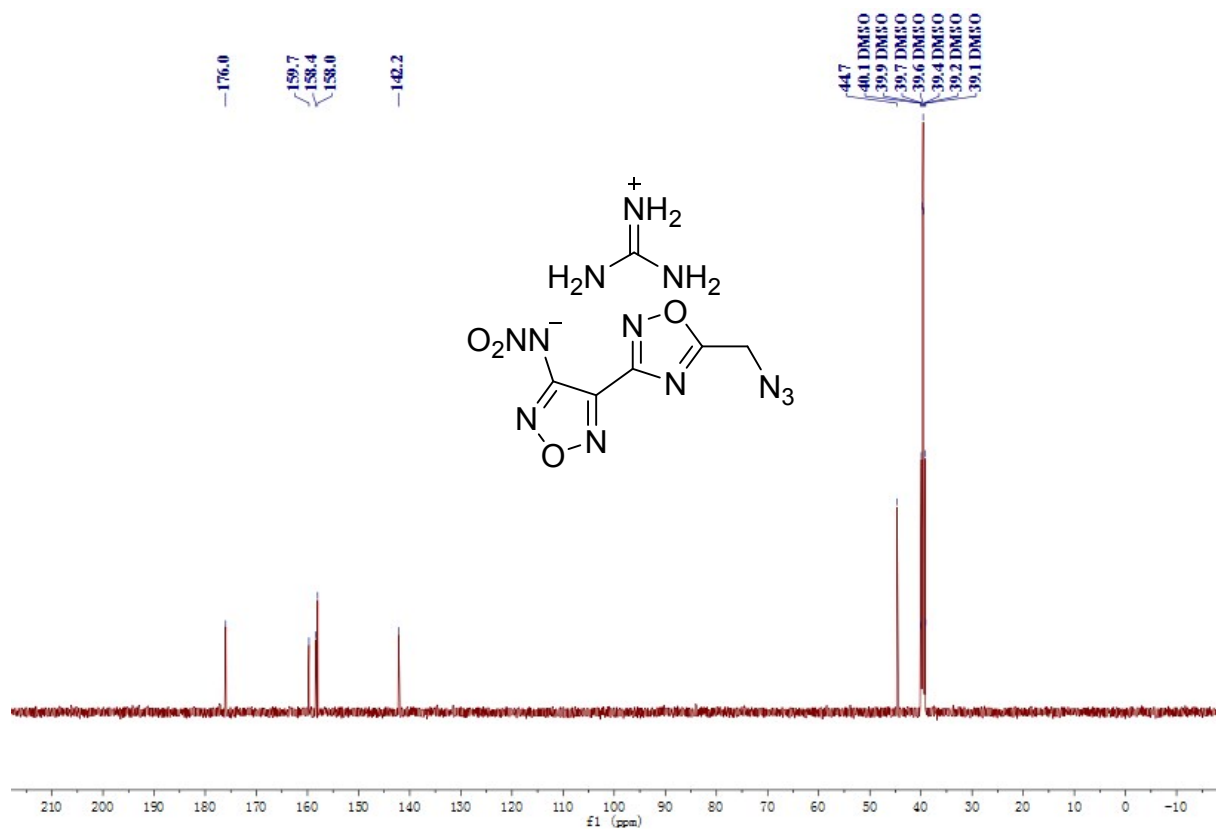

Figure S10 <sup>13</sup>C NMR for compound 7

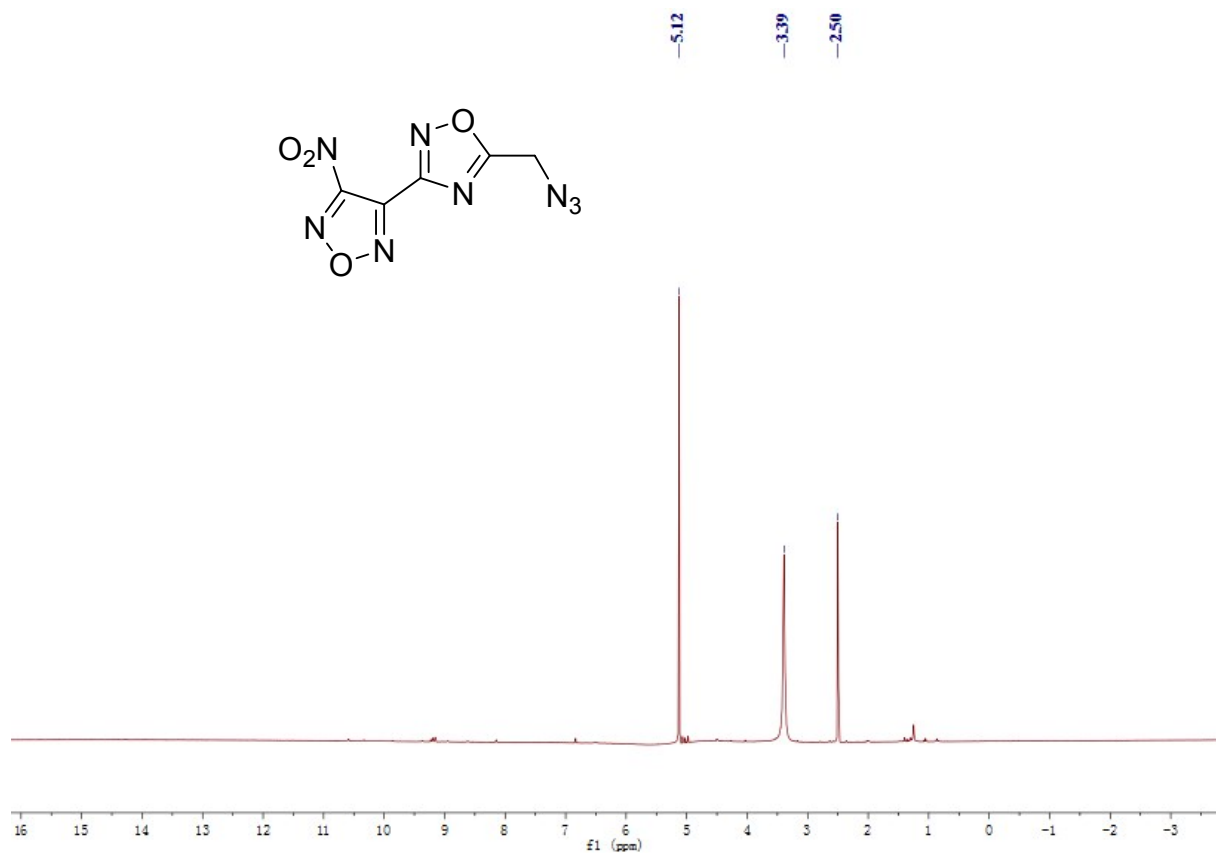

Figure S11 <sup>1</sup>H NMR for compound 8

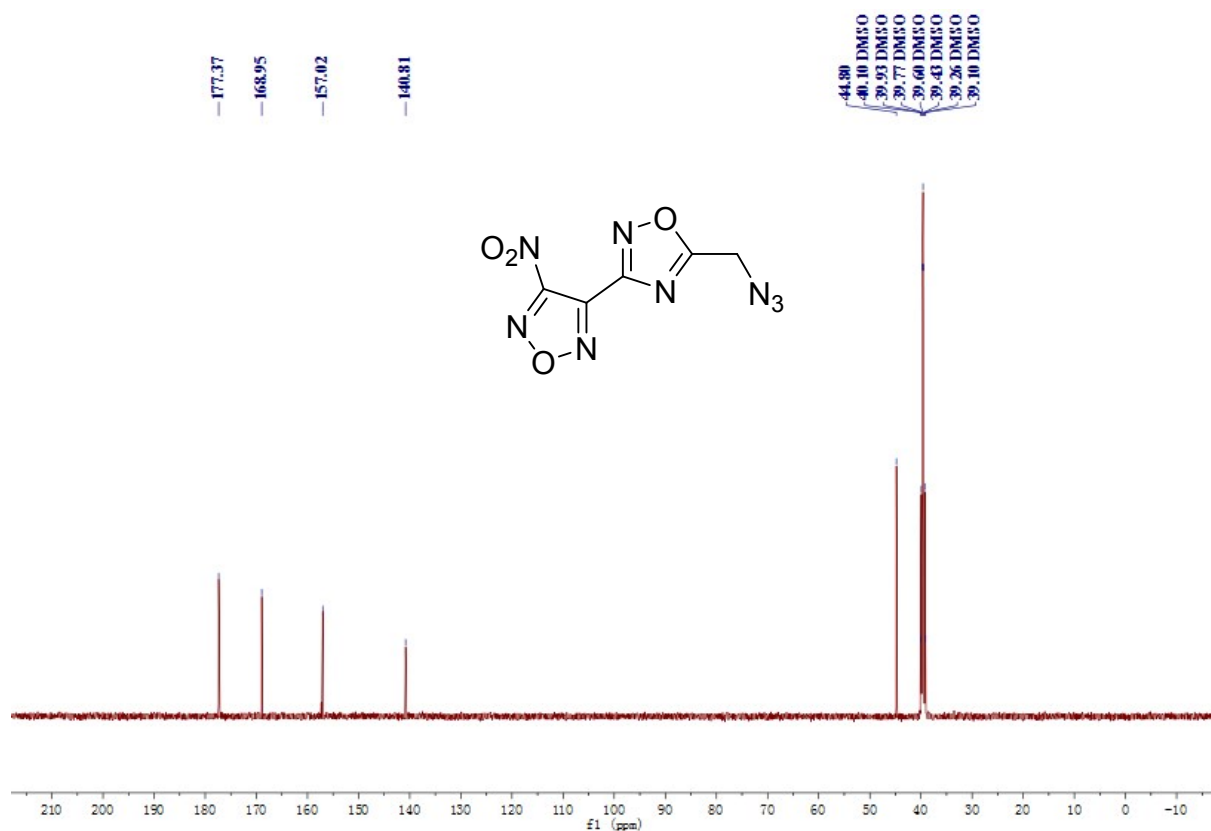

**Figure S12** <sup>13</sup>C NMR for compound **8**

#### References

- [S1] M. J. Frisch, G. W. Trucks, H. B. Schlegel, M. A. G. E. Scuseria, J. R. C. Robb, G. Scalmani, V. Barone, B. Mennucci, G. A. Petersson, H. Nakatsuji, M. Caricato, X. Li, H. P. Hratchian, A. F. Izmaylov, G. Z. J. Bloino, J. L. Sonnenberg, M. Hada, M. Ehara, K. Toyota, R. Fukuda, J. Hasegawa, M. Ishida, T. Nakajima, Y. Honda, O. Kitao, H. Nakai, T. Vreven, J. A. Montgomery, J. E. P. Jr., F. Ogliaro, M. Bearpark, J. J. Heyd, E. Brothers, K. N. Kudin, V. N. Staroverov, R. Kobayashi, J. Normand, K. Raghavachari, A. Rendell, J. C. Burant, S. S. Iyengar, M. J. Tomasi, Cossi, N. Rega, J. M. Millam, M. Klene, J. E. Knox, V. J. B. Cross, Bakken, C. Adamo, J. Jaramillo, R. Gomperts, O. R. E. Stratmann, Yazyev, A. J. Austin, R. Cammi, C. Pomelli, R. L. J. W. Ochterski, Martin, K. Morokuma, V. G. Zakrzewski, G. A. Voth, P. Salvador, J. J. Dannenberg, S. Dapprich, O. F. A. D. Daniels, J. B., Foresman, J. V. Ortiz, J. Cioslowski, D. J. Fox, *Gaussian 09, Revision D.01, Gaussian Inc Wallingford CT* **2009**.
- [S2] H. D. B. Jenkins, D. Tudela, L. Glasser, Lattice potential energy estimation for complex ionic salts from density measurements, *Inorg. Chem.* 2002, 41, 2364-2367.
